# Supplementary material for: Curcumin modulates chronic myelogenous leukemia exosomes composition and affects angiogenic phenotype via exosomal miR-21
Source: PubMed Central journal article supplement (PMC5058690; doi:10.18632/oncotarget.8483), 2016-03-30
Supplement: oncotarget-07-30420-s001.pdf [file oncotarget-07-30420-s001.pdf]

## Curcumin modulates chronic myelogenous leukemia exosomes composition and affects angiogenic phenotype *via* exosomal miR-21

### Supplementary Materials

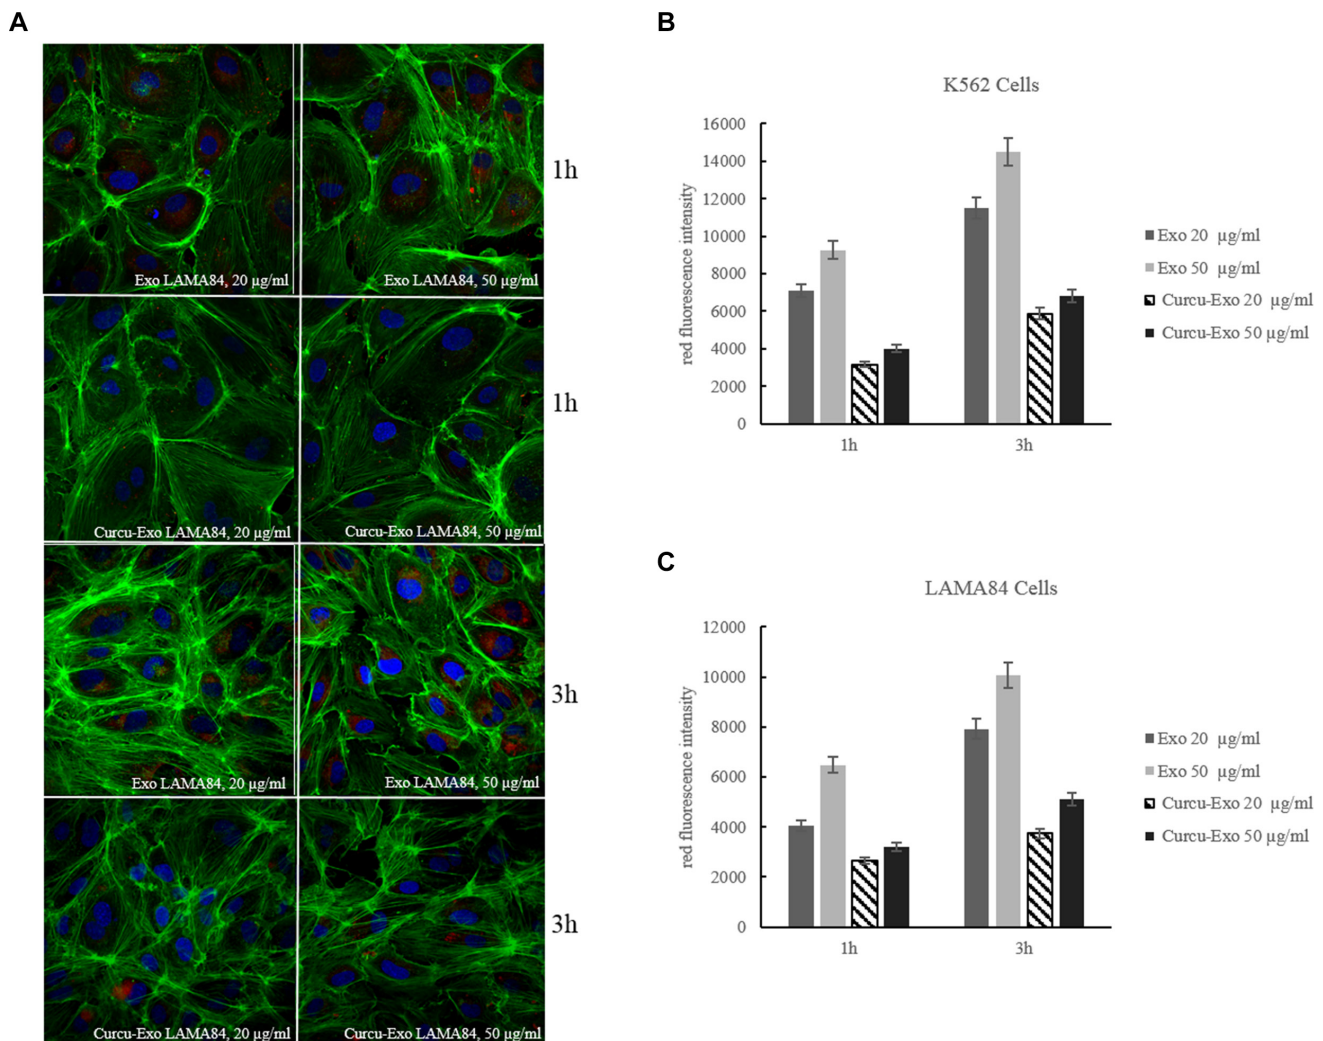

**Supplementary Figure S1:** (A) Analysis at confocal microscopy of HUVECs treated, for 1 and 3 hours, with 20  $\mu\text{g/ml}$  (Exo 20  $\mu\text{g/ml}$ ) and 50  $\mu\text{g/ml}$  (Exo 50  $\mu\text{g/ml}$ ) of LAMA84 exosomes, compared with HUVECs treated, for 3 hours, with 20  $\mu\text{g/ml}$  (Curcu-Exo 20  $\mu\text{g/ml}$ ) and 50  $\mu\text{g/ml}$  (Curcu-Exo 50  $\mu\text{g/ml}$ ) of exosomes released from LAMA84 treated with 20  $\mu\text{M}$  Curcumin. HUVECs were stained with ActinGreen (green), nuclear counterstaining was performed using Hoescht (blue); exosomes were labelled with PKH26 (red). (B) The semi-quantitative analysis of K562 exosomes internalization, measured as red fluorescence intensity in the cytoplasm of HUVECs. (C) The semi-quantitative analysis of LAMA84 exosomes internalization, measured as red fluorescence intensity in the cytoplasm of HUVECs.

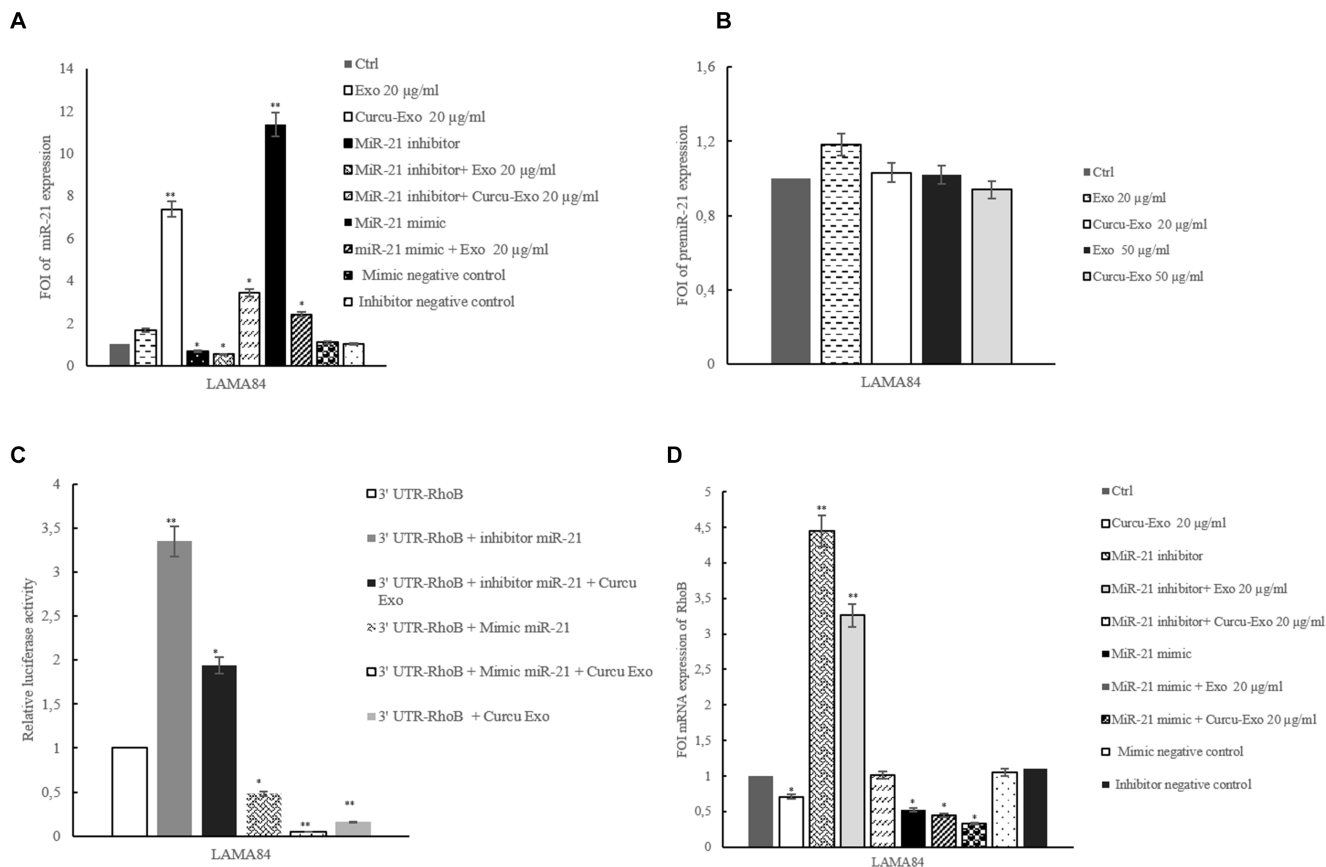

**Supplementary Figure S2: MiR-21 expression in HUVECs treated with exosomes released from LAMA84 treated or not with Curcumin.** (A) miR-21 expression levels in HUVECs treated with 20 µg/ml of LAMA84 Curcu-exosomes and control exosomes were determined by quantitative Real time PCR analysis. Values are the mean ± SD of 3 independent experiments \* $p \leq 0.05$ , \*\* $p \leq 0.01$ . (B) Pre-miR-21 expression in HUVECs treated with different amounts of LAMA84 exosomes. Pre-miR-126 expression levels in HUVECs treated with 20 and 50 µg/ml of LAMA84 exosomes were determined by quantitative Real time PCR analysis. (C) Luciferase activity of HUVECs transfected with reporter plasmid (RhoB-pEZX), treated with LAMA84 Curcu-exosomes and control exosomes and/or cotransfected with miR-21 inhibitor or miR-21 mimic. (D) Real time PCR analysis showed that RhoB mRNA expression decreased in LAMA84 cells treated with Curcu-exosomes compared to control exosomes. Expression of RhoB was also evaluated in HUVECs transfected with miR-21 inhibitor (2-Ome-miR-21) treated or not with 20 µg/ml of LAMA84 control and Curcu-exosomes (2-Ome-miR-21 + Exo 20 µg/ml) and in HUVECs transfected with miR-21 mimic (miR-21 mimic) treated or not with 20 µg/ml of exosomes (miR-21 mimic + Exo 20 µg/ml). Values are the mean ± SD of 3 independent experiments \* $p \leq 0.05$ , \*\* $p \leq 0.01$ .

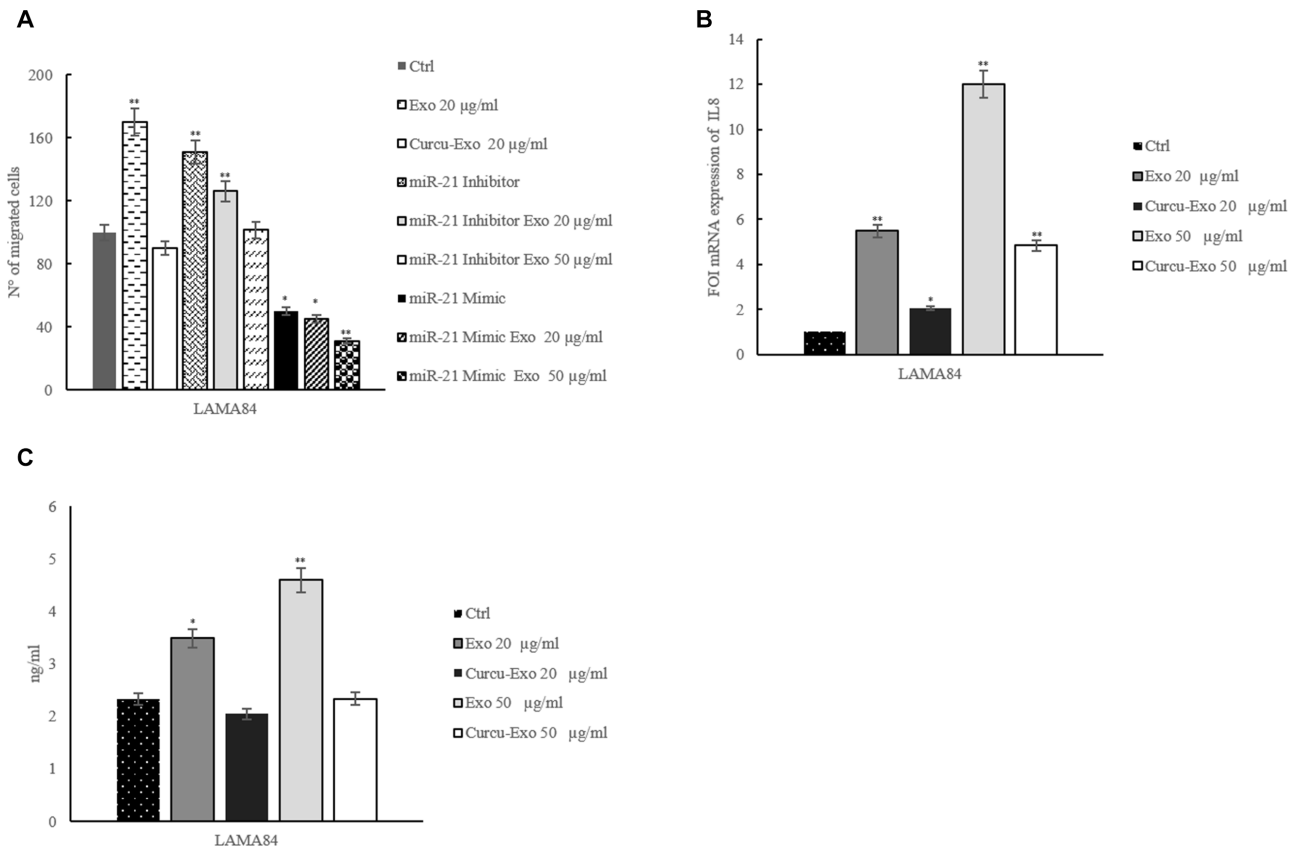

**Supplementary Figure S3: Curcu-exosomes inhibit HUVECs migration.** (A) Addition of control exosomes (20, 50 µg/ml) to the upper wells of the chamber induces a dose-dependent increase of HUVEC migration, the addition of Curcu-exosomes reverts these effects. Values are the mean ± SD of 3 fields in three independent experiments \* $p \leq 0.05$ , \*\* $p \leq 0.01$ . The migration ability of HUVECs transfected with miR-21 inhibitor (2-Ome-miR-21) and treated or not with 20 µg/ml of LAMA84 control and Curcu-exosomes (2-Ome-miR-21 + Exo 20 µg/ml) and in HUVECs transfected with miR-21 mimic (miR-21 mimic) and treated or not with 20 µg/ml of exosomes (miR-21 mimic + Exo 20 µg/ml) was also evaluated. (B) Treatment of HUVECs with Curcu-Exosomes modulated IL8 expression. Real time PCR analysis showed that IL8 mRNA expression in dose dependent manner in HUVECs after addition of Curcu-exosomes compared to control exosomes. (C) ELISA assay showed that IL8 protein expression decreased in EC treated with Curcu-exosomes compared to control exosomes, in dose dependent manner.

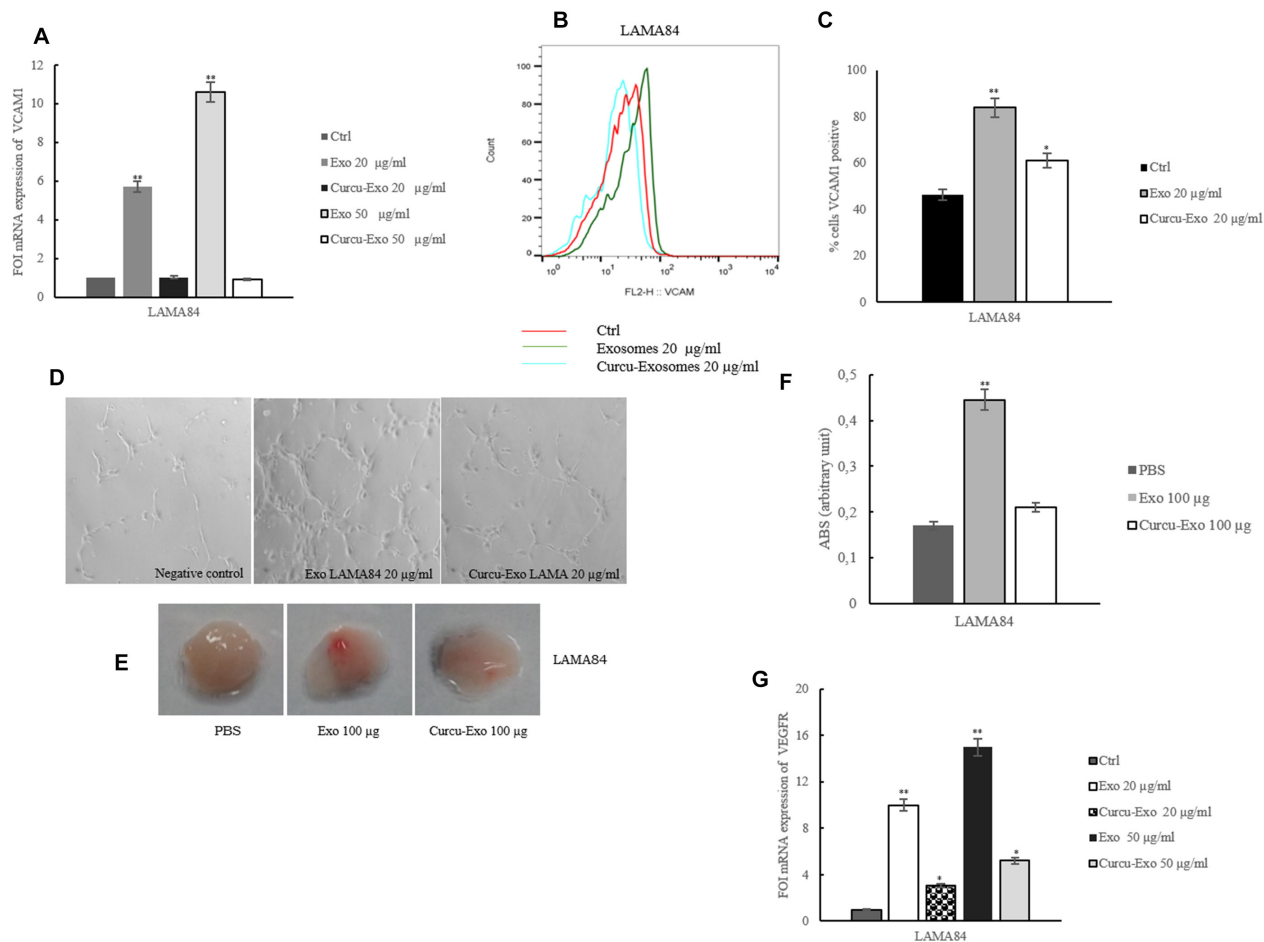

**Supplementary Figure S4: Treatment of HUVECs with Curcu-Exosomes modulated VCAM1 expression.** (A) Real time PCR analysis showed that VCAM1 mRNA expression decreased in dose dependent manner in EC treated with Curcu-exosomes compared to control exosomes. (B) FACS analysis showed that VCAM1 protein expression decreased in Curcu-exosomes respect to control exosome. (C) Histogram shows the percentage of VCAM1 positive HUVECs after 6 hours of treatment with: low serum medium (Ctrl), 20  $\mu\text{g/ml}$  of exosomes (Exo 20  $\mu\text{g/ml}$ ) and 20  $\mu\text{g/ml}$  of Curcu-exosomes (Curcu-exo 20  $\mu\text{g/ml}$ ). Values are the mean  $\pm$  SD of 3 fields in three independent experiments \* $p \leq 0.05$ , \*\* $p \leq 0.01$ . (D) LAMA84 exosomes stimulate in vitro and in vivo angiogenesis. Phase contrast micrographs showing that LAMA84 control exosomes induce an endothelial network formation on Matrigel, LAMA84 Curcu-exosomes revert this effect. No tube formation is observed when HUVECs are plated in low-serum medium (negative control). (E) Matrigel plug containing LAMA84 exosomes stimulate angiogenesis in mice (Exo 100  $\mu\text{g}$ ), this effect revert with LAMA84 Curcu-exosomes (Curcu-Exo 100  $\mu\text{g}$ ), PBS was used as negative control. (F) Haemoglobin concentration in the exosomes-containing Matrigel was evaluated with Dabkin's assay. (G) Treatment of HUVECs with Curcu-Exosomes modulated VEGF expression.

**A**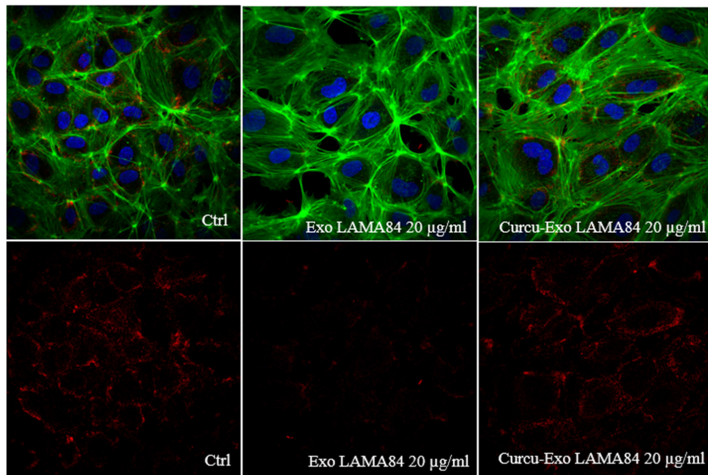**B**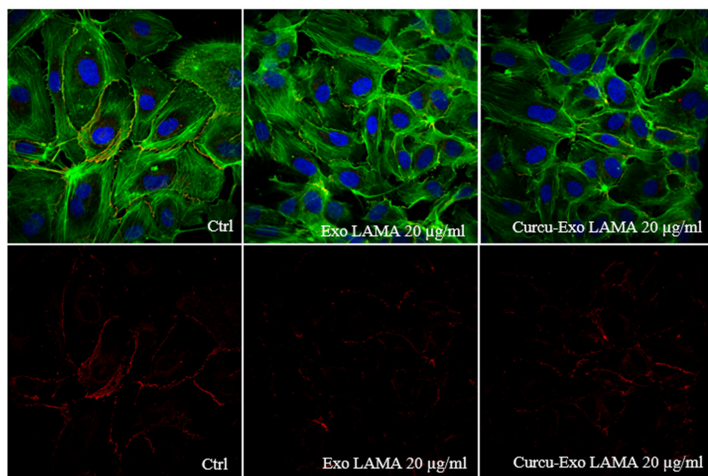**C**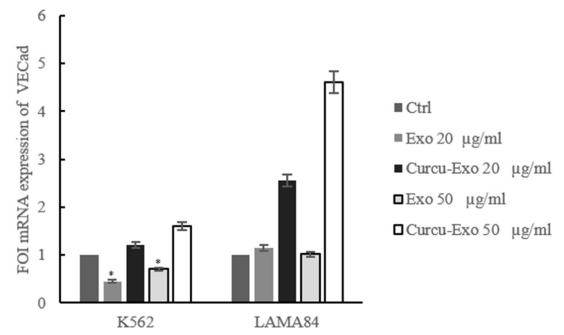**D**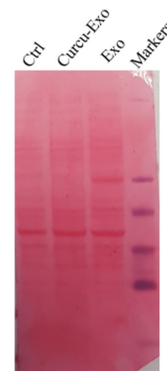

**Supplementary Figure S5: Alteration of HUVEC monolayer after addition of LAMA84 exosomes.** (A) Analysis at confocal microscopy of ZO-1 localization in HUVECs treated with LAMA84 exosomes revealed a decrease of immunostaining compared to untreated cells (control). The treatment with LAMA84 Curcu-exosomes reverted this effect. (B) Analysis at confocal microscopy of VE-Cadherin localization in HUVECs treated with LAMA84 exosomes revealed a decrease of immunostaining compared to untreated cells (control). The treatment with LAMA84 Curcu-exosomes reverted this effect. (C) Treatment of HUVECs with Curcu-Exosomes modulated VE-Cadherin mRNA expression. (D) Nitrocellulose membrane of western blotting for MARCKS stains with red ponceau.

**Supplementary Table S1: Spectral reference library**

**Supplementary Table S2: Protein quantification**
